# Supplementary material for: A fluorescent probe for hypochlorite based on the modulation of the unique rotation of the N–N single bond in acetohydrazide
Source: Royal Society of Chemistry journal article supplement (doi:10.1039/c5cc03972j), 2015-01-01
Supplement: c5cc03972j1.pdf [file c5cc03972j1.pdf]

*Supporting Information for*

## **A Fluorescent Probe for Hypochlorite Based on Modulating the Unique Rotation of N-N Single Bond in Acetohydrazide**

Lingliang Long,<sup>\*a</sup> Yanjun Wu,<sup>a</sup> Lin Wang,<sup>a</sup> Aihua Gong,<sup>b</sup> Feilong Hu,<sup>c</sup> Chi Zhang,<sup>\*a</sup>

<sup>a</sup> Scientific Research Academy & School of Chemistry and Chemical Engineering, Jiangsu University, Zhenjiang, Jiangsu 212013 (P. R. China).

<sup>b</sup> School of Medicine, Jiangsu University, Zhenjiang, Jiangsu 212013, (P. R. China).

<sup>c</sup> College of Chemistry and Materials, Yulin Normal University, Yulin, Guangxi 537000 (P. R. China).

Email: Longlingliang@163.com; Chizhang@ujs.edu.cn.

## Table of contents

|                                             | page  |
|---------------------------------------------|-------|
| Materials and Instruments                   | S3    |
| Scheme S1                                   | S4    |
| Synthesis                                   | S4-S6 |
| Preparation of the test solution            | S6    |
| Determination of fluorescence quantum yield | S7    |
| Determination of the detection limit        | S7    |
| Preparation of the Polymer Films            | S7    |
| Cell culture and fluorescence imaging       | S7    |
| Computational details                       | S8    |
| Figure S1                                   | S8    |
| Figure S2                                   | S9    |
| Figure S3                                   | S9    |
| Figure S4                                   | S10   |
| Table S1                                    | S10   |
| Table S2                                    | S10   |
| Table S3                                    | S11   |
| Table S4                                    | S12   |
| Figure S5                                   | S13   |
| Figure S6                                   | S13   |
| Figure S7                                   | S14   |
| Figure S8                                   | S14   |
| Figure S9                                   | S15   |
| Figure S10                                  | S15   |
| Figure S11                                  | S16   |
| Figure S12                                  | S16   |
| Figure S13                                  | S17   |
| Figure S14                                  | S17   |
| Figure S15                                  | S18   |
| Figure S16                                  | S18   |
| Figure S17                                  | S19   |
| Figure S18                                  | S19   |
| Figure S19                                  | S20   |
| Figure S20                                  | S20   |
| Figure S21                                  | S21   |
| Figure S22                                  | S21   |
| Figure S23                                  | S22   |
| References                                  | S23   |

**Materials and Instruments:** Unless otherwise stated, all reagents were purchased from commercial suppliers and used without further purification. Solvents were purified and dried by standard methods prior to use. Twice-distilled water was used throughout all experiments. The solutions of OCl<sup>-</sup>, H<sub>2</sub>O<sub>2</sub> and *t*-BuOOH were prepared from 5.2% NaClO, 30% H<sub>2</sub>O<sub>2</sub>, and 70% *t*-BuOOH respectively. <sup>1</sup>O<sub>2</sub> was chemically generated from the H<sub>2</sub>O<sub>2</sub>/MoO<sub>4</sub><sup>2-</sup> system in alkaline media.<sup>1, 2</sup> Hydroxyl radical was generated by Fenton reaction.<sup>3, 4</sup> Nitric oxide was generated from SNP (sodium nitroferricyanide (III) dihydrate).<sup>5, 6</sup> TLC analyses were performed on silica gel plates and column chromatography was conducted over silica gel (mesh 200-300), both of which were obtained from the Qingdao Ocean Chemicals. Melting points of compounds were measured on a Beijing Taike XT-4 microscopy melting point apparatus, and all melting points were uncorrected. Mass spectra were recorded on a LXQ Spectrometer (Thermo Scientific) operating on ESI. <sup>1</sup>H and <sup>13</sup>C-NMR spectra were recorded on a Bruker Avance 400 spectrometer operating at 400 MHz and 100 MHz respectively. The Crystallographic data were collected on a Saturn 724<sup>+</sup> CCD X-ray diffractometer by using graphite monochromated Mo *K* $\alpha$  ( $\lambda = 0.71070$  Å). Elemental (C, H, N) analysis were carried out using Flash EA 1112 analyzer. Electronic absorption spectra were obtained on a SHIMADZU UV-2450 spectrometer. Fluorescence spectra were measured on a Photon Technology International (PTI) Quantamaster fluorometer with 3 nm excitation and emission slit widths. Confocal fluorescence microscopy imaging experiments were performed on a Leica TCS SP5 II laser confocal scanning microscope. The pH measurements were performed with a pH-3c digital pH-meter (Shanghai ShengCi Device Works, Shanghai, China) with a combined glass-calomel electrode.

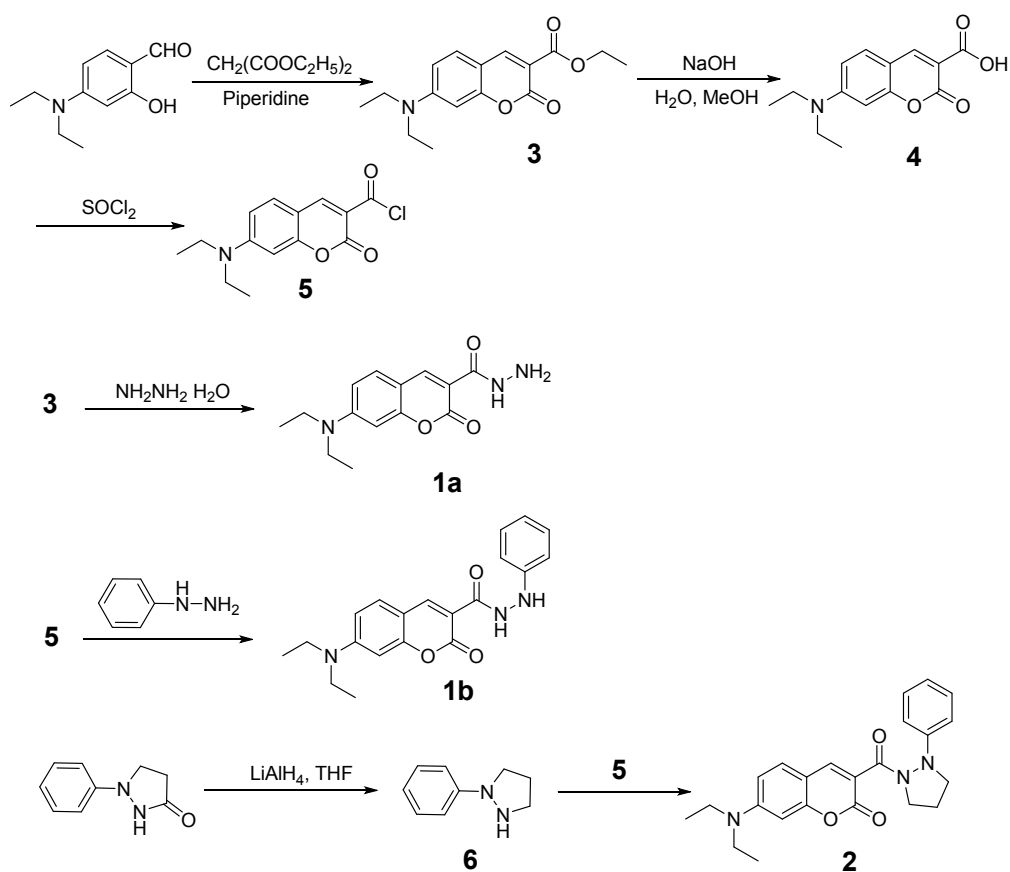

**Schem**

**e S1.** The synthetic procedure of compound **1a**, **1b**, and **2**.

### Synthesis of ethyl 7-(diethylamino)-2-oxo-2H-chromene-3-carboxylate (**3**)

A solution of 4-(diethylamino)-2-hydroxybenzaldehyde (3.86 g, 20 mmol), diethyl malonate (6.4 g, 40 mmol) and piperidine (2 mL) in 60 mL of ethanol was refluxed for 24 h. After cooling to room temperature, the solvent was evaporated under vacuum. The resulting residue was purified by column chromatography (ethyl acetate: petroleum ether = 1:4, v/v), yielding a yellow solid (4.02g, 69.5%). Mp: 75-76 °C; <sup>1</sup>H NMR (400 MHz, CDCl<sub>3</sub>) δ (ppm): 8.45 (s, 1 H), 7.30 (d, *J* = 9.2 Hz, 1 H), 6.56 (dd, *J* = 2.4 Hz, 9.2 Hz, 1 H), 6.40 (d, *J* = 2.4 Hz, 1 H), 4.34 (q, *J* = 7.2 Hz, 2 H), 3.42 (q, *J* = 7.2 Hz, 4 H), 1.37 (t, *J* = 7.2 Hz, 3 H), 1.22 (t, *J* = 7.2 Hz, 6 H); MS (ESI) *m/z* 290.01 [M+H]<sup>+</sup>.

### Synthesis of 7-(diethylamino)-2-oxo-2H-chromene-3-carboxylic acid (**4**)

Compound **3** (2.89 g, 10 mmol) and NaOH (0.4g, 10 mmol) were suspended in 50% aqueous MeOH (40 mL) and heated to reflux for 15 min. The reaction mixture was then cooled to room temperature and neutralized with 3 M HCl carefully to pH = 2. The precipitate was then filtered and washed with H<sub>2</sub>O and cold MeOH. After dried

over vacuum, the compound **4** was obtained as orange solid (1.88g, 71.9%). Mp: 229-233°C; <sup>1</sup>H NMR (400 MHz, CDCl<sub>3</sub>) δ (ppm): 12.38 (s, 1H), 8.67 (s, 1H), 7.47 (d, *J* = 9.2 Hz, 1 H), 6.73 (dd, *J* = 2.4 Hz, 8.8 Hz, 1H), 6.54 (d, *J* = 2.4 Hz, 1H), 3.51 (q, *J* = 7.2 Hz, 4H), 1.29 (t, *J* = 7.2 Hz, 6H); MS (ESI) *m/z* 260.02 [M-H]<sup>-</sup>.

#### **Synthesis of 7-(diethylamino)-2-oxo-2H-chromene-3-carbonyl chloride (5)**

Under nitrogen atmosphere, compound **4** (1.15 g, 4.40 mmol) was added to dry SOCl<sub>2</sub> solution (9 ml) and the suspension was stirred at room temperature for 3 hours. Then the mixture was filtered and washed with ethyl ether to afford the yellow solid **5** (1.0 g, 81.3 %), which was not purified and used for the next step reaction immediately.

#### **Synthesis of 7-(diethylamino)-2-oxo-2H-chromene-3-carbohydrazide (1a)**

Hydrazine monohydrate (1.5 mL, 85%) was added to a solution of compound **3** (3.0 g, 10.3 mmol) in EtOH (20 mL). The reaction mixture was stirred at room temperature for 1 hour under nitrogen atmosphere. After cooling in an ice bath for 20 min, the resulting precipitate was filtered and washed 3 times with cold ethanol (3×50 mL). Then the precipitate was further dried under vacuum to give **1a** as orange needles (1.55 g, 54.7%). Mp: 160-165 °C; <sup>1</sup>H NMR (400 MHz, CDCl<sub>3</sub>) δ (ppm): 9.74 (s, 1H), 8.69 (s, 1H), 7.45 (d, *J* = 8.8 Hz, 1H), 6.67 (dd, *J* = 2.4 Hz, 8.8 Hz, 1H), 6.51 (d, *J* = 2.4 Hz, 1H), 4.15 (d, *J* = 4.8 Hz, 2H), 3.47 (q, *J* = 7.2 Hz, 4H), 1.26 (t, *J* = 7.2 Hz, 6H); <sup>13</sup>C NMR (100 MHz, CDCl<sub>3</sub>) δ (ppm): 163.9, 162.1, 157.6, 152.7, 148.0, 131.1, 110.0, 109.1, 108.2, 96.6, 45.1, 12.4; MS (ESI) *m/z* 276.07 [M+H]<sup>+</sup>; Elemental analysis calcd (%) for C<sub>14</sub>H<sub>17</sub>N<sub>3</sub>O<sub>3</sub>: C 61.08, H 6.22, N 15.26; found C 60.85, H 6.25, N 15.19.

#### **Synthesis of 7-(diethylamino)-2-oxo-N'-phenyl-2H-chromene-3-carbohydrazide (1b)**

Under nitrogen atmosphere, triethylamine (1 mL) was added dropwise to a solution of compound **5** (0.839g, 3.0 mmol) and phenylhydrazine (0.324g, 3.0 mmol) in dry CH<sub>2</sub>Cl<sub>2</sub> (30 mL). The mixture was stirring at room temperature for 16 hours. After removed the solvent under reduced pressure, the residue was purified by column chromatography (dichloromethane: petroleum ether: methanol = 90:30:1, v/v), affording a yellow solid (0.554 g, 52.6%). Mp: 201-203 °C; <sup>1</sup>H NMR (400 MHz, DMSO-*d*<sub>6</sub>) δ (ppm): 9.97 (s, 1H), 8.65 (s, 1H), 7.98 (s, 1H), 7.70 (d, *J* = 9.2 Hz, 1H), 7.16 (t, *J* = 8.4 Hz, 1H), 6.80 (m, 4H), 6.65 (d, *J* = 2.4 Hz, 1H), 3.49 (q, *J* = 7.2 Hz,

4H), 1.15 (t,  $J = 7.2$  Hz, 6H);  $^{13}\text{C}$  NMR (100 MHz, DMSO- $d_6$ )  $\delta$  (ppm): 163.3, 161.8, 157.8, 153.1, 149.5, 148.4, 132.1, 129.2, 119.2, 112.8, 110.7, 109.5, 108.1, 96.4, 44.8, 12.8; MS (ESI)  $m/z$  352.0  $[\text{M}+\text{H}]^+$ ; Elemental analysis calcd (%) for  $\text{C}_{20}\text{H}_{21}\text{N}_3\text{O}_3$ : C 68.36, H 6.02, N 11.96; found C 68.15, H 6.05, N 11.91.

### Synthesis of 1-phenylpyrazolidine (6)

The compound **6** was synthesized according to a reported procedure.<sup>7</sup> Under nitrogen atmosphere, a solution of 1-phenylpyrazolidin-3-one (0.5 g, 3.1 mmol) and Lithium Aluminium Hydride (0.46 g, 12.1 mmol) in dry THF (12 mL) was refluxed for 18 hours. After cooling to room temperature, 30 mL ether and 30 mL water were added. The white solid was removed by filtration. The organic phase was collected by separation funnel and concentrated under reduced pressure to afford the compound **6** (0.376 g), which was used for the next step without further purification.

### Synthesis of 7-(diethylamino)-3-(2-phenylpyrazolidine-1-carbonyl)-2H-chromen-2-one (2)

Under nitrogen atmosphere, triethylamine (1 mL) was added dropwise to a solution of compound **5** (0.4025 g, 1.44 mmol) and compound **6** (0.133 g, 0.897 mmol) in dry  $\text{CH}_2\text{Cl}_2$  (30 mL). The mixture was stirring at room temperature for 3 hours. After removed the solvent under reduced pressure, the resulting residue was purified by column chromatography (dichloromethane: petroleum ether: methanol = 100:25:1, v/v), affording a yellow solid (0.259 g, 73.7 %). Mp: 204-208 °C;  $^1\text{H}$  NMR (400 MHz,  $\text{CDCl}_3$ )  $\delta$  (ppm): 7.61 (s, 1H), 7.23(t,  $J = 7.2$  Hz, 2H), 7.14 (d,  $J = 7.6$  Hz, 1H), 6.93 (m, 3H), 6.50 (d,  $J = 8.0$  Hz, 1H), 6.42 (s, 1H), 3.66 (t,  $J = 6.4$  Hz, 2H), 3.39 (q,  $J = 7.2$  Hz, 4H), 2.10 (s, 2H), 1.63 (m, 2H), 1.19 (t,  $J = 7.2$  Hz, 6H);  $^{13}\text{C}$  NMR (100 MHz,  $\text{CDCl}_3$ )  $\delta$  (ppm): 167.8, 159.2, 156.8, 151.1, 150.5, 141.3, 129.5, 129.1, 122.1, 115.6, 108.8, 107.5, 97.1, 54.6, 44.8, 43.1, 24.7, 12.4; MS (ESI)  $m/z$  392.10  $[\text{M}+\text{H}]^+$ ; Elemental analysis calcd (%) for  $\text{C}_{23}\text{H}_{25}\text{N}_3\text{O}_3$ : C 70.57, H 6.44, N 10.73; found C 70.26, H 6.47, N 10.69.

**Preparation of the test solution:** The stock solution of probe **1b** ( $5.0 \times 10^{-4}$  M) was prepared in  $\text{CH}_3\text{CN}$ , and the stock solution of various testing species ( $1 \times 10^{-3}$  M) was prepared by dissolving an appropriate amount of testing species in water. The test solution of the probe **1b** (10  $\mu\text{M}$ ) in 20 mM potassium phosphate buffer (pH 7.4, containing 20%  $\text{CH}_3\text{CN}$  as co-solvent) was prepared by placing 0.1 mL of the probe

**1b** stock solution, 0.9 mL CH<sub>3</sub>CN, and an appropriate aliquot of each testing species stock into a 5 mL volumetric flask, and then diluting the solution to 5 mL with 20 mM potassium phosphate buffer (pH 7.4). The resulting solution was shaken well and incubated at room temperature for 10 min before recording the spectra.

**Determination of fluorescence quantum yield:** Fluorescence quantum yield was determined using the solutions of quinine sulfate ( $\Phi_F = 0.546$  in 1N H<sub>2</sub>SO<sub>4</sub>)<sup>8</sup> as a standard. The quantum yield was calculated using the following equation:<sup>9-11</sup>

$$\Phi_{F(X)} = \Phi_{F(S)} (A_S F_X / A_X F_S) (n_X / n_S)^2$$

Where  $\Phi_F$  is the fluorescence quantum yield,  $A$  is the absorbance at the excitation wavelength,  $F$  is the area under the corrected emission curve, and  $n$  is the refractive index of the solvents used. Subscripts S and X refer to the standard and to the unknown, respectively.

**Determination of the detection limit:** The detection limit was determined from fluorescence titration data based on a reported method.<sup>12-15</sup> According to the result of titration experiment, the graph of  $(I_{\min} - I) / (I_{\min} - I_{\max})$  versus  $\log [\text{OCl}^-]$  was plotted, where the  $I$  is the fluorescence intensity at 468 nm,  $I_{\min}$  and  $I_{\max}$  are the minimum and maximum fluorescence intensity at 468 nm respectively. A linear regression curve was then fitted (Fig. S6), and the intercept of the line at x-axis was taken as detection limit.

**Preparation of the Polymer Films:** Poly(-methylmethacrylate) polymer (1.0 g, 99.8% (w/w)) and compound **1b** (2.0 mg, 0.2% (w/w)) were dissolved in CH<sub>2</sub>Cl<sub>2</sub>. The polymer film for testing fluorescence spectra was prepared by spin-coating the mixture solution at 1000 rpm on a quartz glass. After evaporation of the solvent at room temperature, the fluorescence spectra were conducted. Then the polymer film for taking visual fluorescence color photo was prepared by pouring the mixture solution into a glass dish. After evaporation of the solvent at room temperature, the photo was taken under a handheld 365 nm UV lamp.

**Cell culture and fluorescence imaging:** HepG2 cells were seeded in a 24-well plate in Dulbecco's modified Eagle's medium (DMEM) supplemented with 10% fetal

bovine serum for 24 h. Then the cells were incubated with probe **1b** (2  $\mu\text{M}$ ) in the culture medium for 30 min at 37°C. After washing with PBS three times to remove the remaining probe **1b** in culture medium, the cells were further incubated with NaClO (0  $\mu\text{M}$ , 10  $\mu\text{M}$ , 50  $\mu\text{M}$ ) for 20 min at 37°C. Subsequently, fluorescent images were acquired on a Leica TCS SP5 II laser confocal scanning microscope with an objective lens ( $\times 40$ ). The excitation wavelength was set to 405 nm and 633 nm for probe **1b** and nuclear staining (DRAQ5), respectively.

**Computational details:** The calculations were performed with Gaussian 09 program. The parameter referred to the previous work.<sup>16</sup> The ground state structures of the **1a** and **1b** were optimized using density functional theory (DFT) with B3LYP functional and 6-31+G\*\* basis set. The frontier molecular orbitals of **1a** and **1b** and the energy profiles were shown in Fig. S1. It is clear that the energy level of hydrazine or phenylhydrazine (donor) orbital is lower than that of the 7-diethylamino-coumarin fluorochrome (acceptor) orbital in **1a** and **1b**, respectively. This result demonstrates that there is no PET process in **1a** or **1b**.

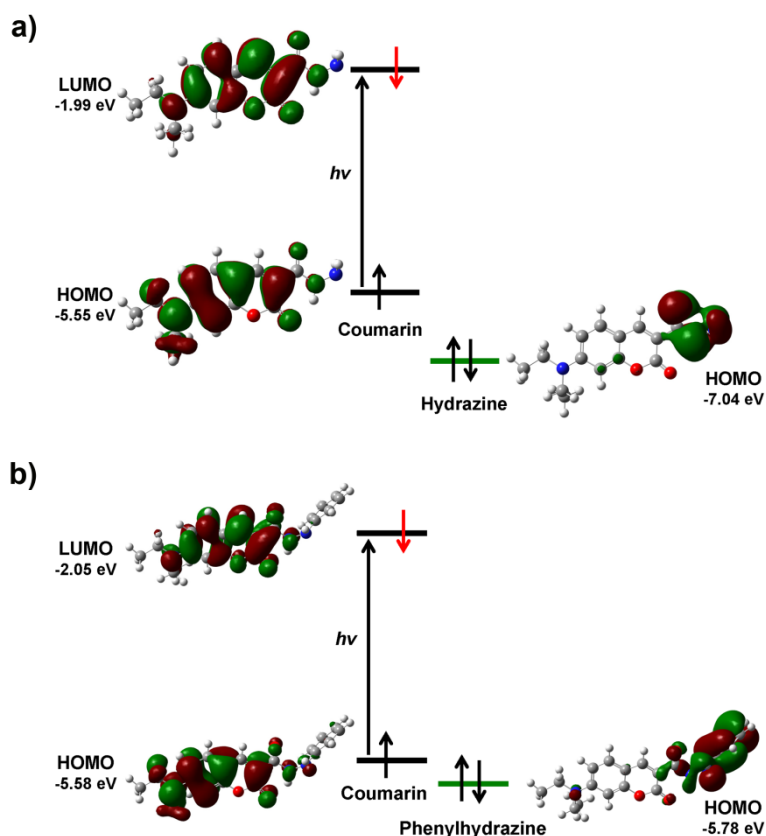

**Figure S1.** Frontier molecular orbital energy illustrations show the relative energetic dispositions of the orbitals of **1a** (a) and **1b** (b). Calculations were performed with the



DFT method (B3LYP/6-31G\*\*) using Gaussian 09 program.

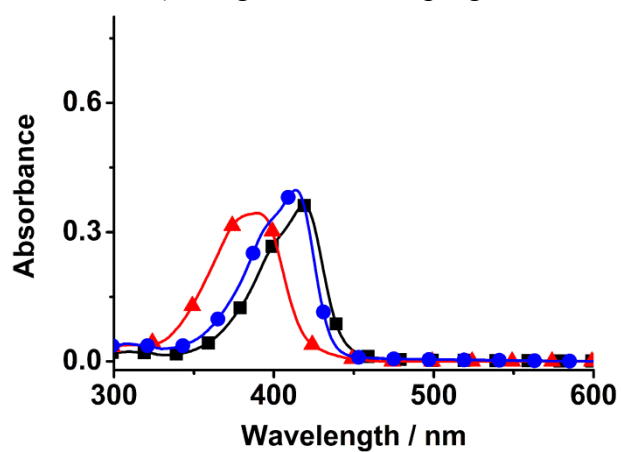

*Figure S2.* The absorption spectra of 10  $\mu$ M **1a** (●), **1b** (■), and **2** (▲) in toluene.

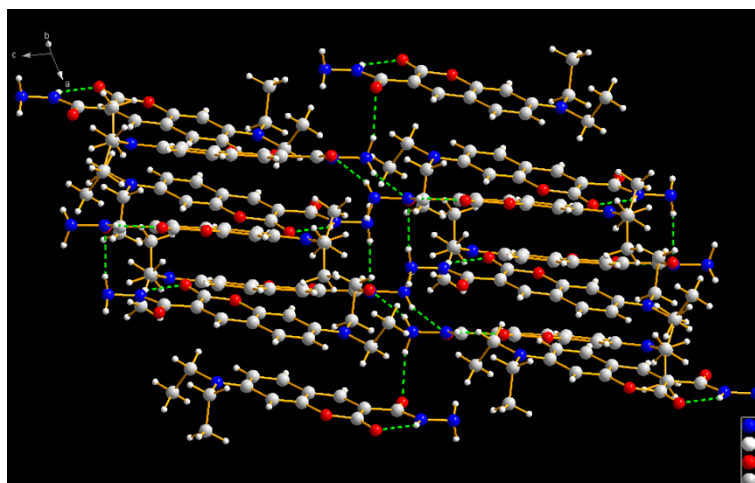

*Figure S3.* Packing diagram of **1a** (ball-and-stick representation); the green dash lines represent hydrogen bonds.

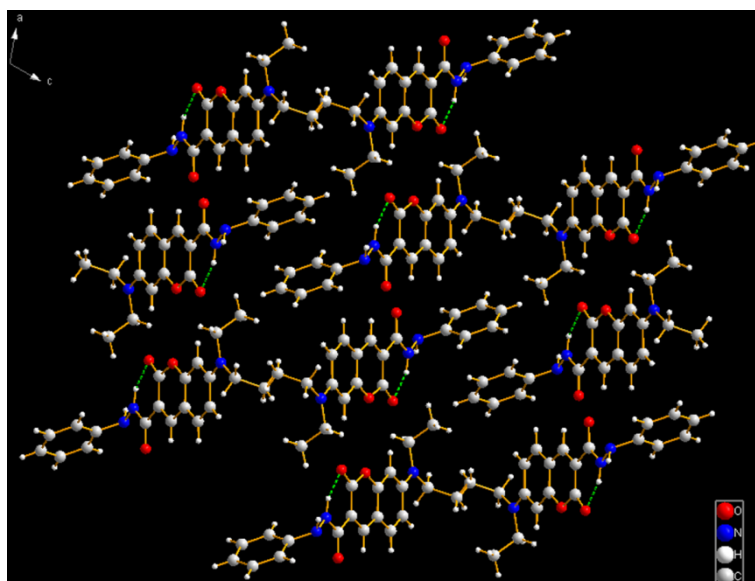

**Figure S4.** Packing diagram of **1b** (ball-and-stick representation); the green dash lines represent hydrogen bonds.

**Table S1** Hydrogen-bond geometry of **1a**.

| D-H    | d(D-H) (Å) | d(H..A) (Å) | <DHA (°) | d(D..A) (Å) | A                 |
|--------|------------|-------------|----------|-------------|-------------------|
| N2-H2  | 0.860      | 1.999       | 138.36   | 2.703       | O2                |
| N3-H3A | 0.919      | 2.109       | 156.53   | 2.975       | O3 <sup>[a]</sup> |
| N3-H3B | 0.932      | 2.122       | 152.84   | 2.981       | O6 <sup>[b]</sup> |
| N5-H5  | 0.860      | 2.043       | 136.73   | 2.734       | O5                |
| N6-H6B | 0.914      | 2.158       | 164.14   | 3.047       | O3 <sup>[c]</sup> |

Symmetry codes: [a] [ -x+1, -y, -z+1 ]; [b] [ x-1, y-1, z-1 ]; [c] [ -x+1, -y+1, -z+2 ].

**Table S2** Hydrogen-bond geometry of **1b**.

| D-H    | d(D-H) (Å) | d(H..A) (Å) | <DHA (°) | d(D..A) (Å) | A  |
|--------|------------|-------------|----------|-------------|----|
| N2-H2A | 0.923      | 1.992       | 135.65   | 2.730       | O2 |

**Table S3.** Crystallographic parameters for compound **1a**

| Compound                                                                             | <b>1a</b>                                                     |
|--------------------------------------------------------------------------------------|---------------------------------------------------------------|
| CCDC                                                                                 | 1036454                                                       |
| Chemical formula                                                                     | C <sub>14</sub> H <sub>17</sub> N <sub>3</sub> O <sub>3</sub> |
| formula weight                                                                       | 275.31                                                        |
| Wavelength (Å)                                                                       | 0.71073                                                       |
| Crystal system                                                                       | Triclinic                                                     |
| Space group                                                                          | P-1                                                           |
| <i>T</i> (K)                                                                         | 293(2)                                                        |
| <i>a</i> (Å)                                                                         | 9.2120(18)                                                    |
| <i>b</i> (Å)                                                                         | 12.624(3)                                                     |
| <i>c</i> (Å)                                                                         | 12.927(3)                                                     |
| $\alpha$ (°)                                                                         | 94.78(3)                                                      |
| $\beta$ (°)                                                                          | 109.99(3)                                                     |
| $\gamma$ (°)                                                                         | 105.42(3)                                                     |
| <i>V</i> (Å <sup>3</sup> )                                                           | 1336.5(5)                                                     |
| <i>Z</i>                                                                             | 4                                                             |
| <i>D</i> (mg/m <sup>-3</sup> )                                                       | 1.368                                                         |
| <i>F</i> (000)                                                                       | 584                                                           |
| $\mu$ (Mo <i>K</i> $\alpha$ )(mm <sup>-1</sup> )                                     | 0.098                                                         |
| $\theta$ range (°)                                                                   | 3.38 ~ 25.00                                                  |
| Goodness of fit on <i>F</i> <sup>2</sup>                                             | 1.040                                                         |
| <i>R</i> <sub>1</sub> , <i>wR</i> <sub>2</sub> [ <i>I</i> > 2 $\sigma$ ( <i>I</i> )] | 0.0350, 0.0912                                                |
| Reflections collected / unique                                                       | 11095 / 4609 [R(int) = 0.0191]                                |
| <i>R</i> indices (all data)                                                          | 0.0424, 0.0962                                                |

$$R = \frac{\sum ||F_0| - |F_c||}{\sum |F_0|}, wR_2 = \left\{ \frac{\sum [w(F_0^2 - F_c^2)^2]}{\sum [w(F_0^2)^2]} \right\}^{1/2}$$

**Table S4.** Crystallographic parameters for compound **1b**

| Compound                                                                             | <b>1b</b>                                                     |
|--------------------------------------------------------------------------------------|---------------------------------------------------------------|
| CCDC                                                                                 | 1036457                                                       |
| Chemical formula                                                                     | C <sub>20</sub> H <sub>21</sub> N <sub>3</sub> O <sub>3</sub> |
| formula weight                                                                       | 351.40                                                        |
| Wavelength (Å)                                                                       | 0.71073                                                       |
| Crystal system                                                                       | Monoclinic                                                    |
| Space group                                                                          | P21/c                                                         |
| <i>T</i> (K)                                                                         | 293(2)                                                        |
| <i>a</i> (Å)                                                                         | 13.1553(7)                                                    |
| <i>b</i> (Å)                                                                         | 6.9401(4)                                                     |
| <i>c</i> (Å)                                                                         | 21.0792(14)                                                   |
| $\alpha$ (°)                                                                         | 90.00                                                         |
| $\beta$ (°)                                                                          | 109.629(5)                                                    |
| $\gamma$ (°)                                                                         | 90.00                                                         |
| <i>V</i> (Å <sup>3</sup> )                                                           | 1812.67(19)                                                   |
| <i>Z</i>                                                                             | 4                                                             |
| <i>D</i> (mg/m <sup>-3</sup> )                                                       | 1.288                                                         |
| <i>F</i> (000)                                                                       | 744                                                           |
| $\mu$ (Mo <i>K</i> $\alpha$ )(mm <sup>-1</sup> )                                     | 0.088                                                         |
| $\theta$ range (°)                                                                   | 3.03 ~ 26.00                                                  |
| Goodness of fit on <i>F</i> <sup>2</sup>                                             | 1.052                                                         |
| <i>R</i> <sub>1</sub> , <i>wR</i> <sub>2</sub> [ <i>I</i> > 2 $\sigma$ ( <i>I</i> )] | 0.0559, 0.1421                                                |
| Reflections collected / unique                                                       | 9709 / 3485 [R(int) = 0.0329]                                 |
| <i>R</i> indices (all data)                                                          | 0.0960, 0.1604                                                |

$$R = \frac{\sum ||F_0| - |F_c||}{\sum |F_0|}, wR_2 = \left\{ \frac{\sum [w(F_0^2 - F_c^2)^2]}{\sum [w(F_0^2)^2]} \right\}^{1/2}$$

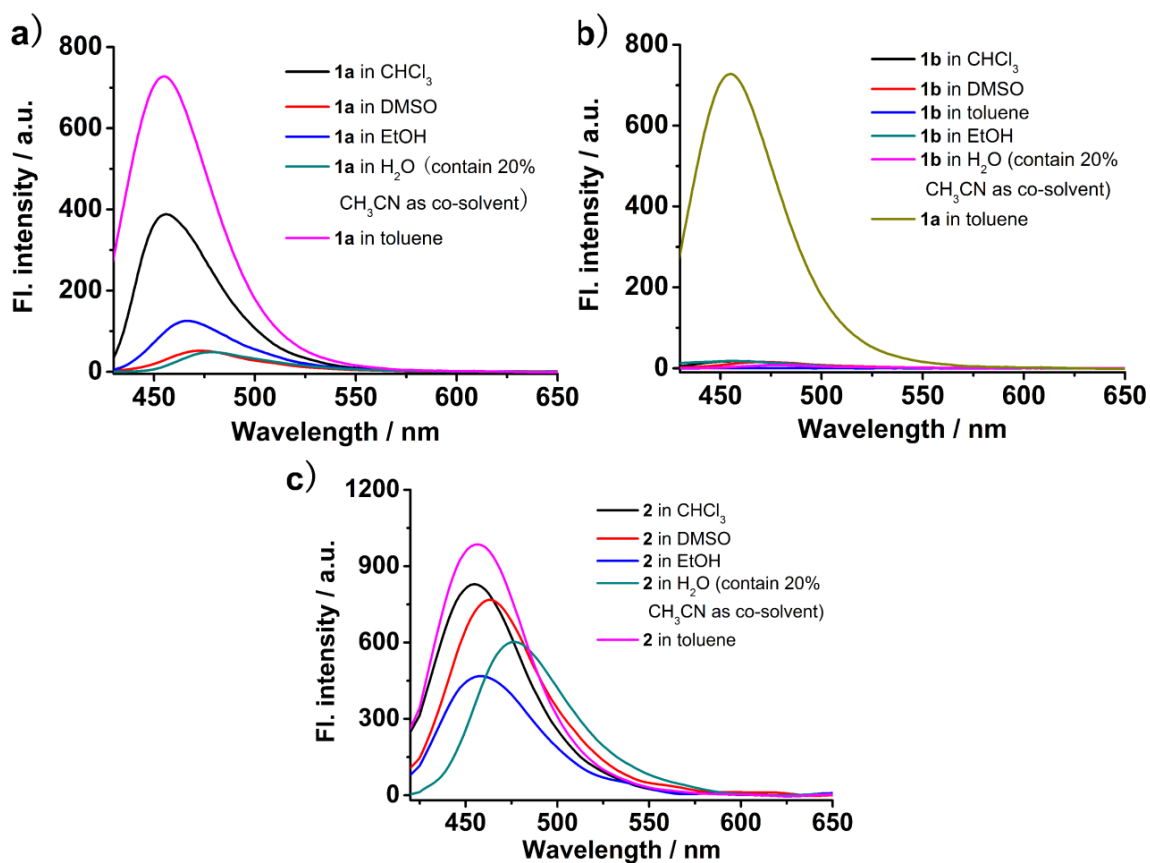

**Figure S5.** The fluorescence emission spectra of 10  $\mu\text{M}$  **1a** (a), **1b** (b), and **2** (c) in various solvents. The emissions of **1b** in different solvents were significantly quenched, thus the emission of **1a** in toluene was shown in (b) for comparison.

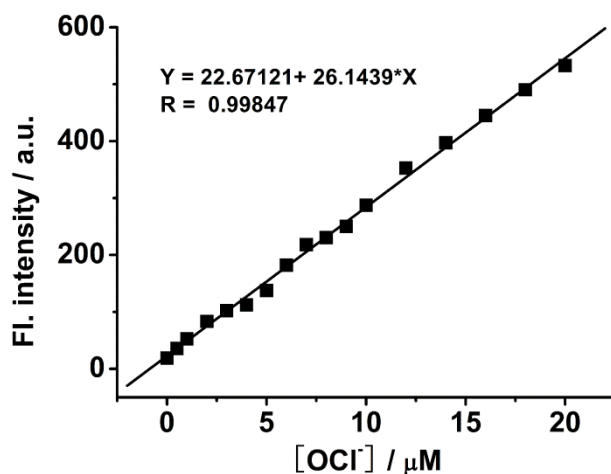

**Figure S6.** The fluorescence intensity of probe **1b** (10  $\mu\text{M}$ ) to various amount of  $\text{OCI}^-$  (0 to 20  $\mu\text{M}$ ). The data were acquired after incubation of probe **1b** with  $\text{OCI}^-$  for 10 min in 20 mM potassium phosphate buffer (pH 7.4, containing 20%  $\text{CH}_3\text{CN}$  as co-solvent) at room temperature. Excitation was provided at 398 nm.

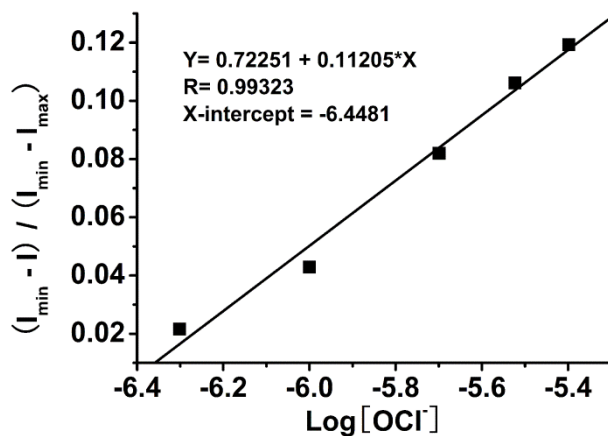

**Figure S7.** Plot of  $(I_{\min} - I) / (I_{\min} - I_{\max})$  versus  $\log [\text{OCl}^-]$  for probe **1b**. Calculated detection limit =  $3.56 \times 10^{-7}$  M.

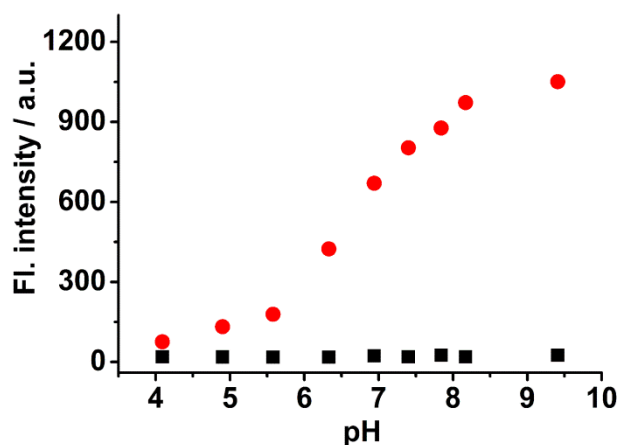

**Figure S8.** The variations of fluorescence intensity of probe **1b** (10  $\mu\text{M}$ ) in the absence (■) or presence (●) of  $\text{OCl}^-$  (60  $\mu\text{M}$ ) as a function of pH ( $\lambda_{\text{ex}}=398$  nm,  $\lambda_{\text{em}}=468$  nm).

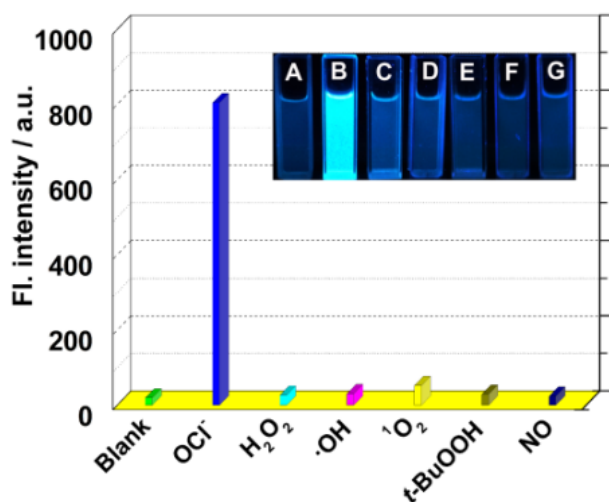

**Figure S9.** Fluorescence responses of probe **1b** (10  $\mu$ M) in the presence of 60  $\mu$ M various species in 20 mM potassium phosphate buffer (pH 7.4, containing 20% CH<sub>3</sub>CN as co-solvent) ( $\lambda_{\text{ex}}$ =398 nm,  $\lambda_{\text{em}}$ = 468 nm). Inset: visual fluorescence color changes of probe **1b** (10  $\mu$ M) in the presence of 60  $\mu$ M various species (A-G: Blank, OCl<sup>-</sup>, H<sub>2</sub>O<sub>2</sub>, ·OH, <sup>1</sup>O<sub>2</sub>, *t*-BuOOH, NO·).

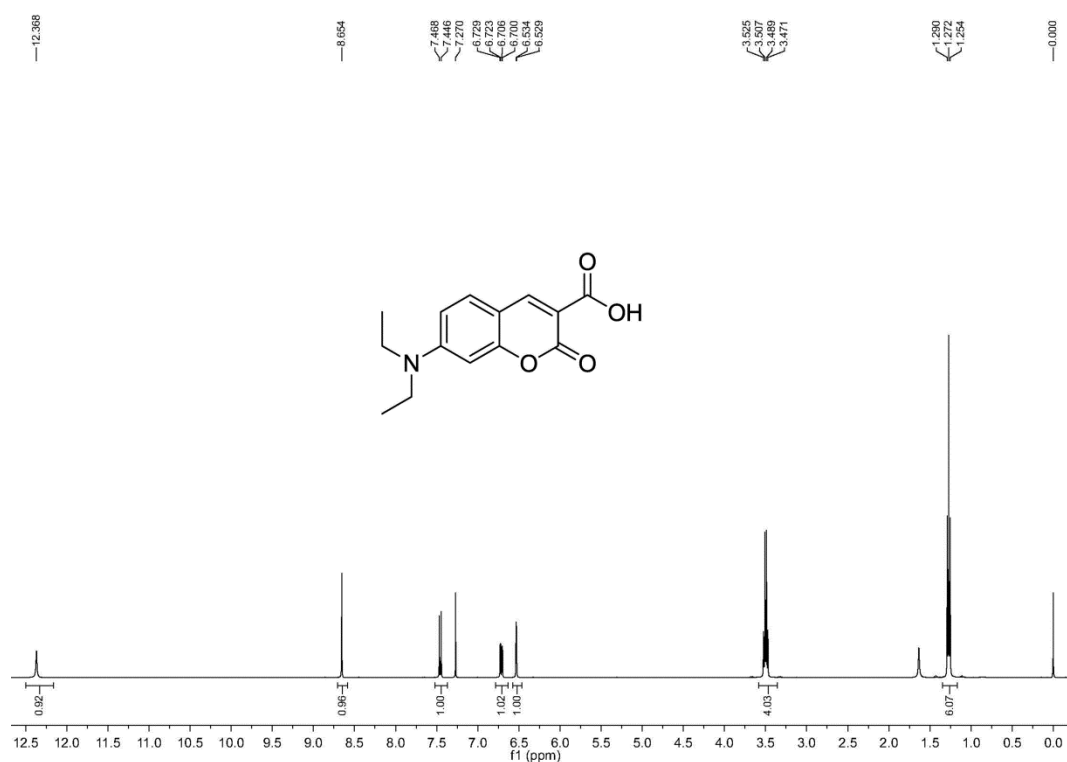

**Figure S10.** <sup>1</sup>H NMR spectra of the isolated product of probe **1a** + NaOCl.

FFCY21\_140805183823 #4 RT: 0.09 AV: 1 NL: 1.02E7  
T: +cESI Full ms [150.00-2000.00]

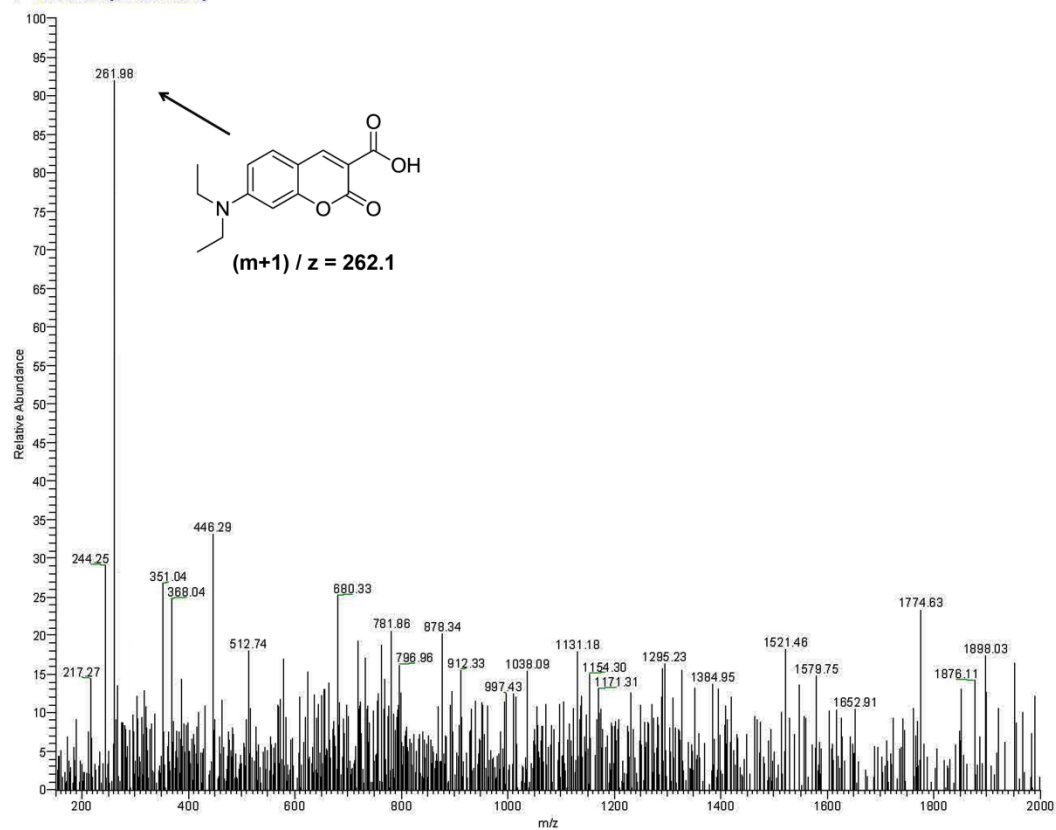

**Figure S11.** The ESI-MS spectra of the isolated product of probe **1a** + NaOCl.

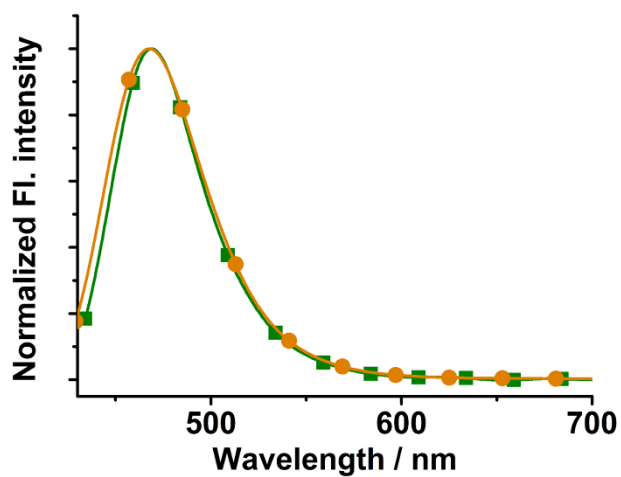

**Figure S12.** Normalized fluorescence emission spectra of 7-(Diethylamino)coumarin-3-carboxylic acid (●) and the isolated product of probe **1b** + NaOCl (■) ( $\lambda_{ex}$ =398 nm).



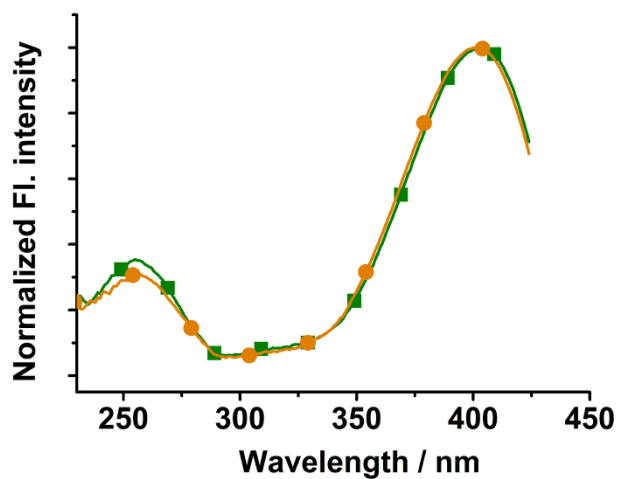

**Figure S13.** Normalized fluorescence excitation spectra of 7-(Diethylamino)coumarin-3-carboxylic acid (●) and the isolated product of probe **1b** + NaOCl (■) ( $\lambda_{em}$  = 468 nm).

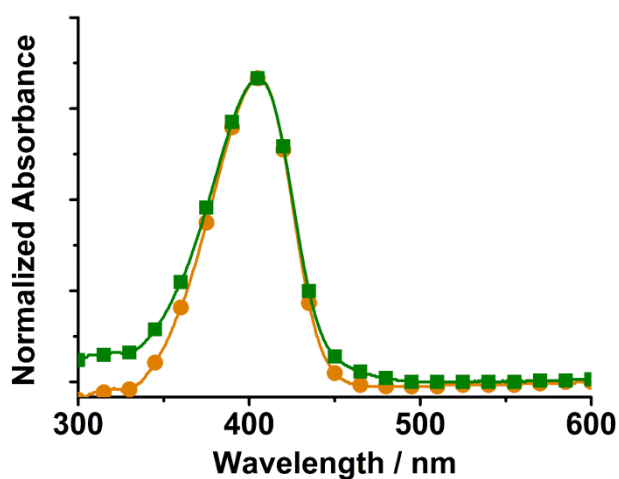

**Figure S14.** Normalized absorption spectra of 7-(Diethylamino)coumarin-3-carboxylic acid (●) and the isolated product of probe **1b** + NaOCl (■).

2014101501 #511 RT: 13.08 AV: 1 SB: 2 13.05, 13.11 NL: 2.23E7  
T: + c ESI Full ms [ 150.00-2000.00]

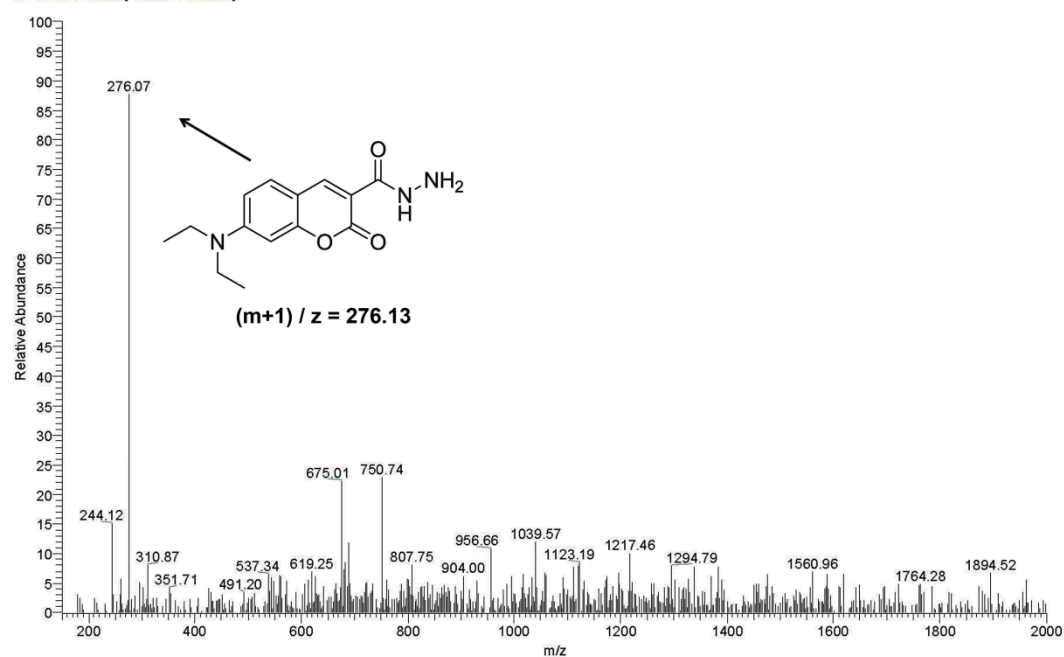

Figure S15. ESI-MS spectra of **1a**.

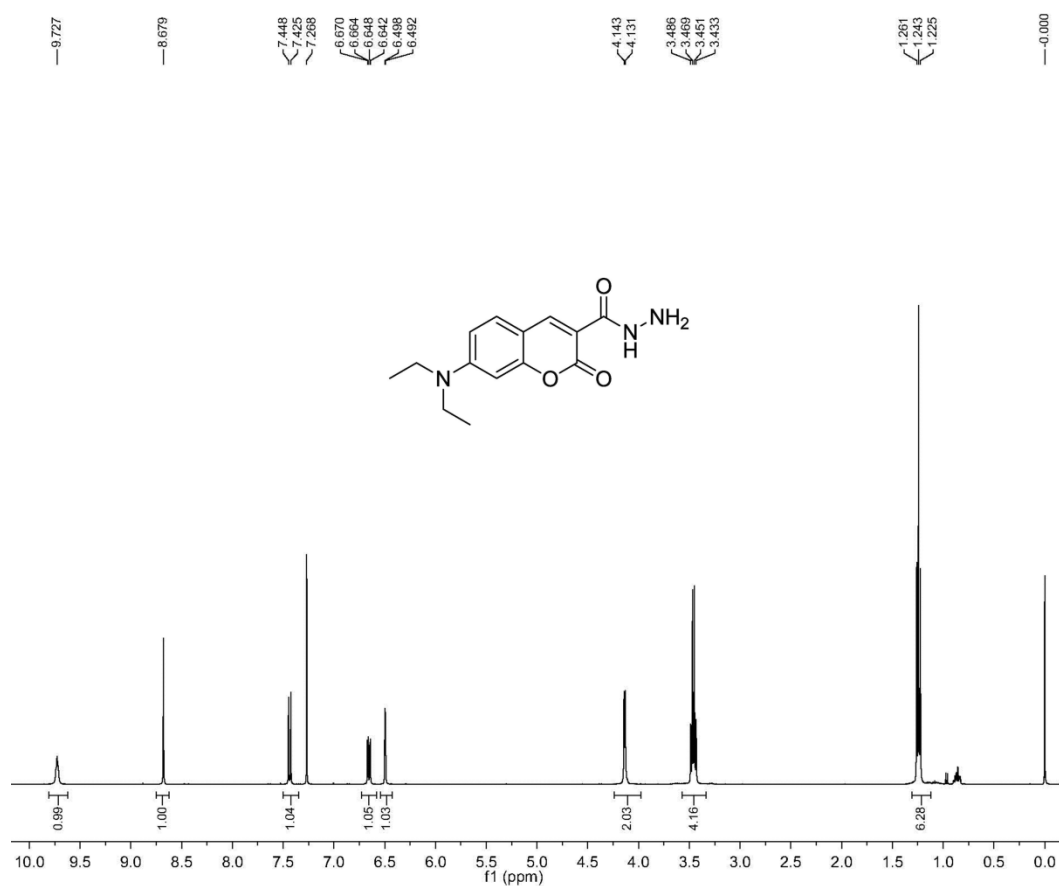

Figure S16.  $^1\text{H}$  NMR spectra of **1a**.

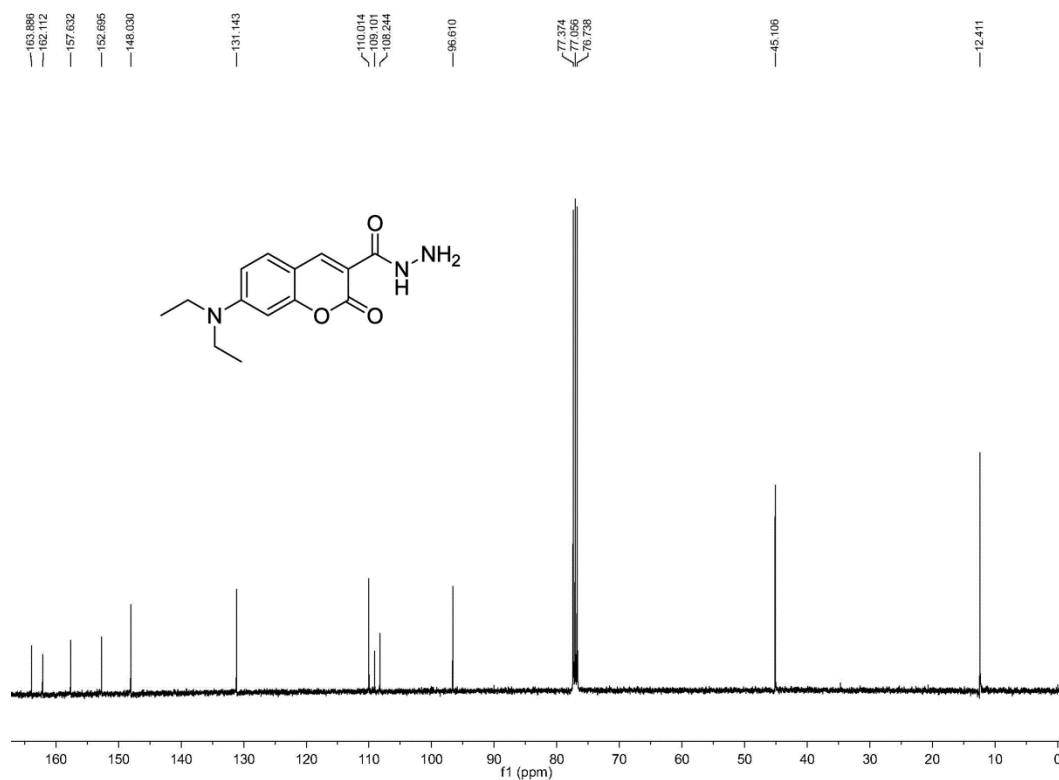

Figure S17. <sup>13</sup>C NMR spectra of 1a.

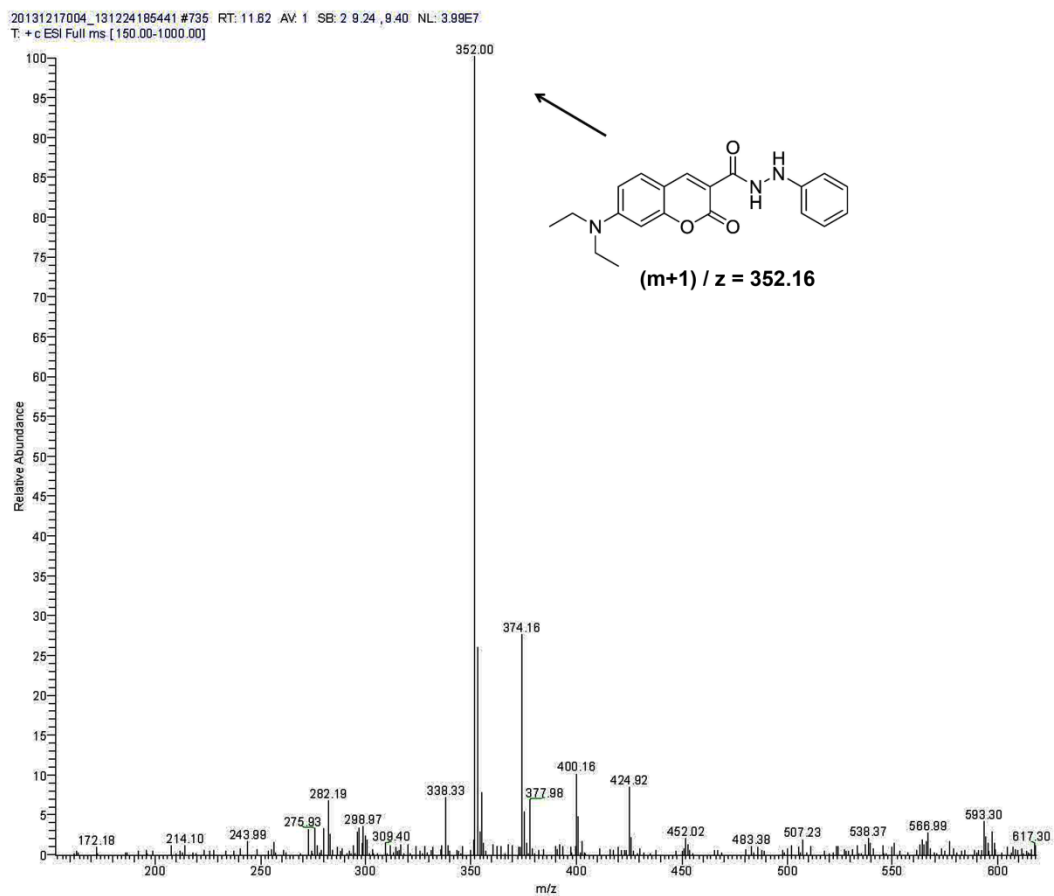

Figure S18. ESI-MS spectra of 1b.

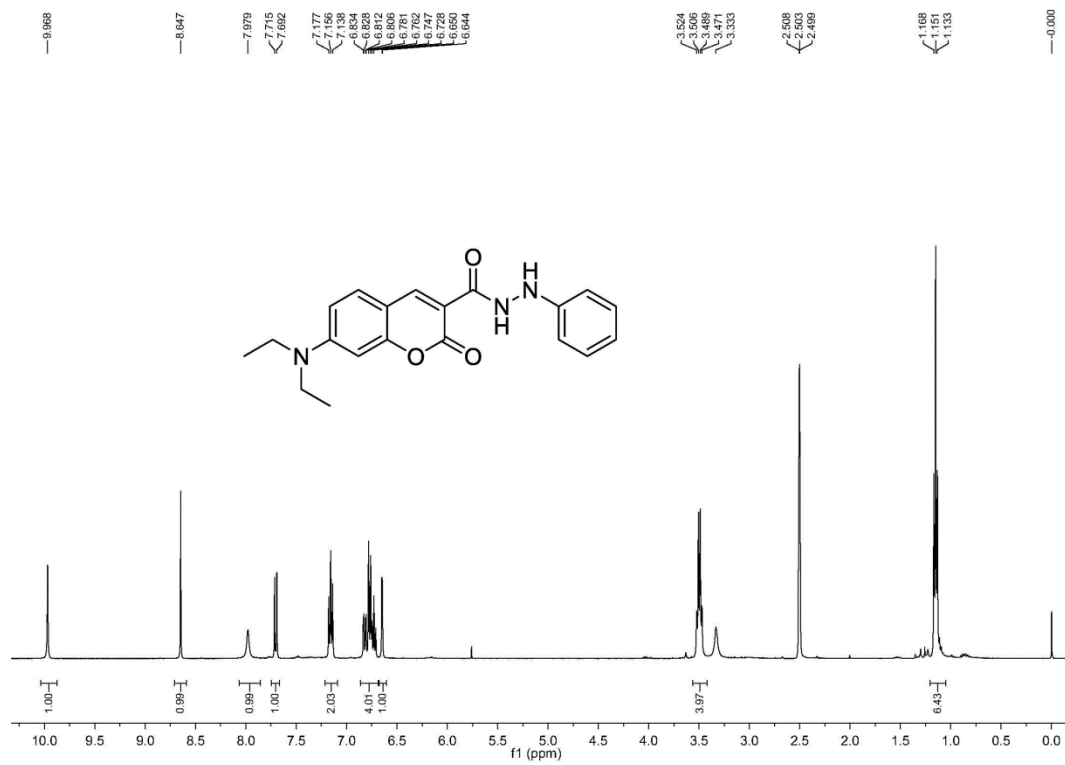

Figure S19. <sup>1</sup>H NMR spectra of 1b.

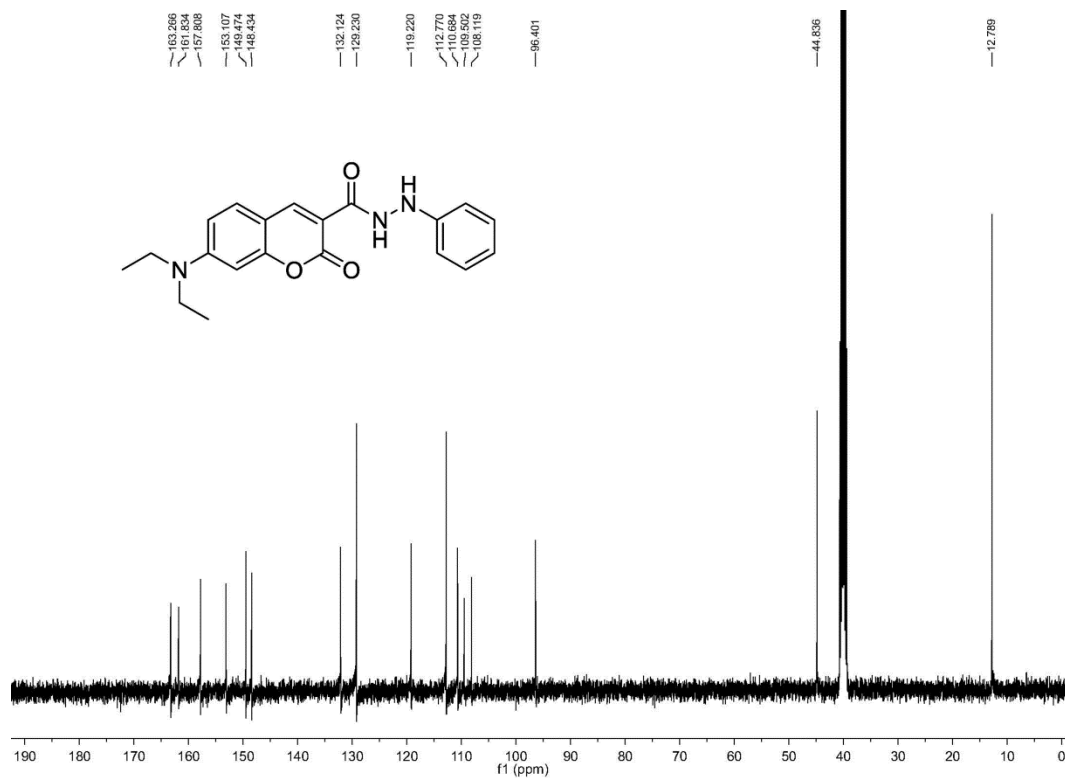

Figure S20. <sup>13</sup>C NMR spectra of 1b.

2014101501\_141015130242 #60 RT: 0.93 AV: 1 SB: 2 0.89 0.94 NL: 7.01E6  
T: +c ESI Full ms [150.00-800.00]

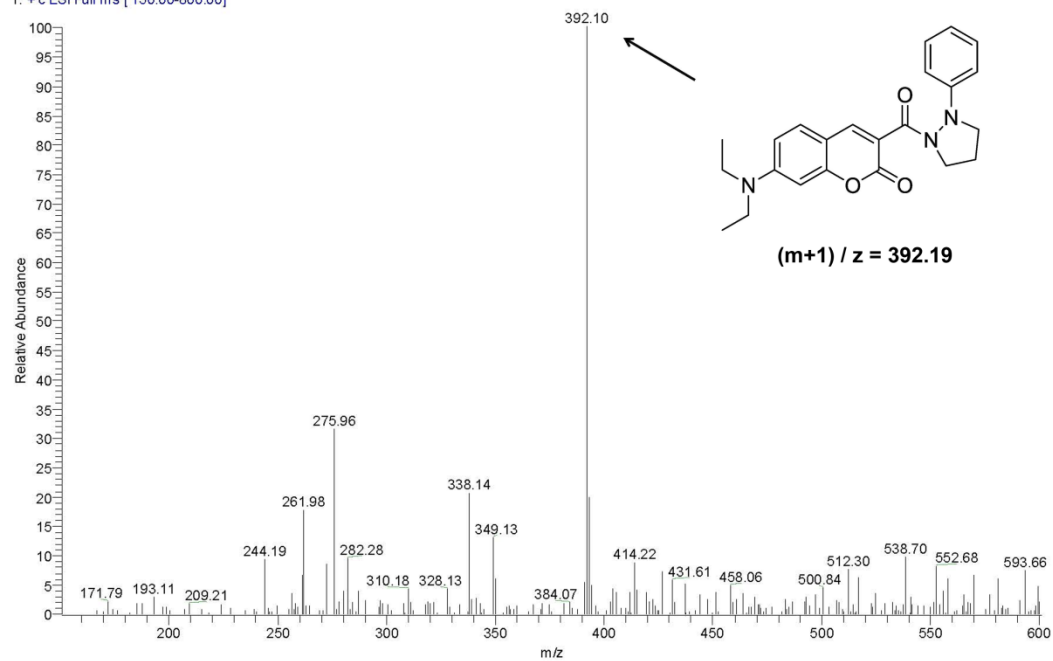

Figure S21. ESI-MS spectra of 2.

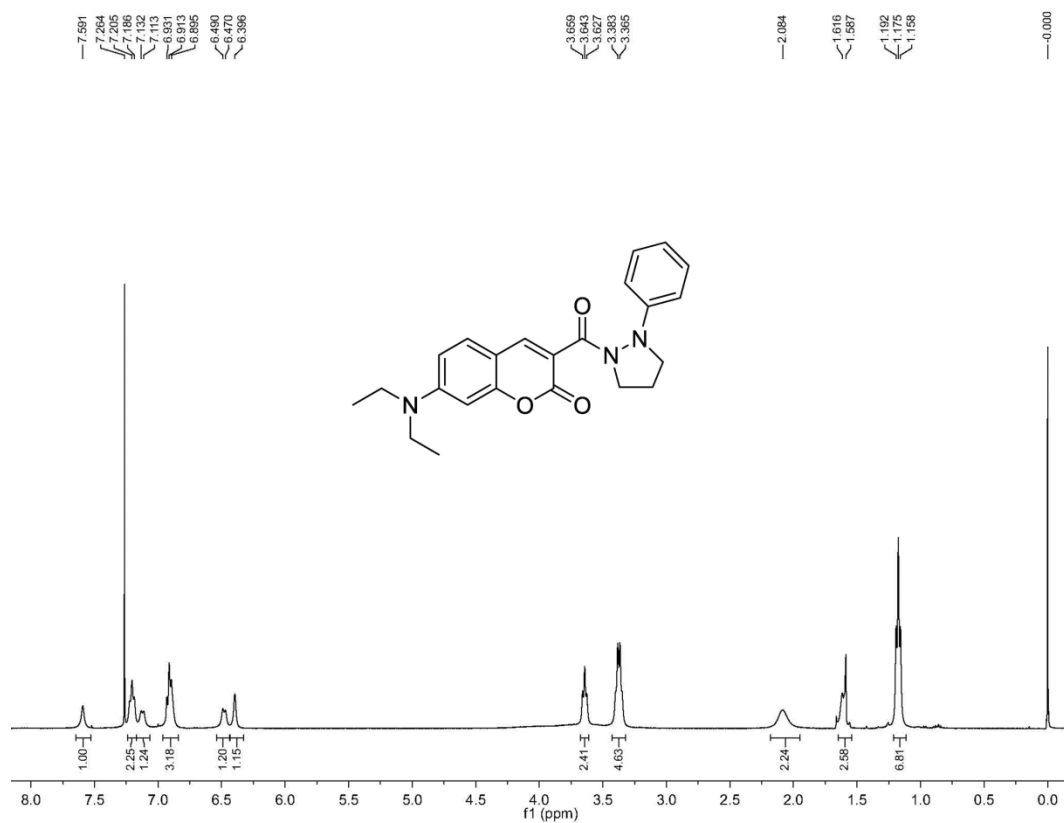

Figure S22.  $^1\text{H}$  NMR spectra of 2.

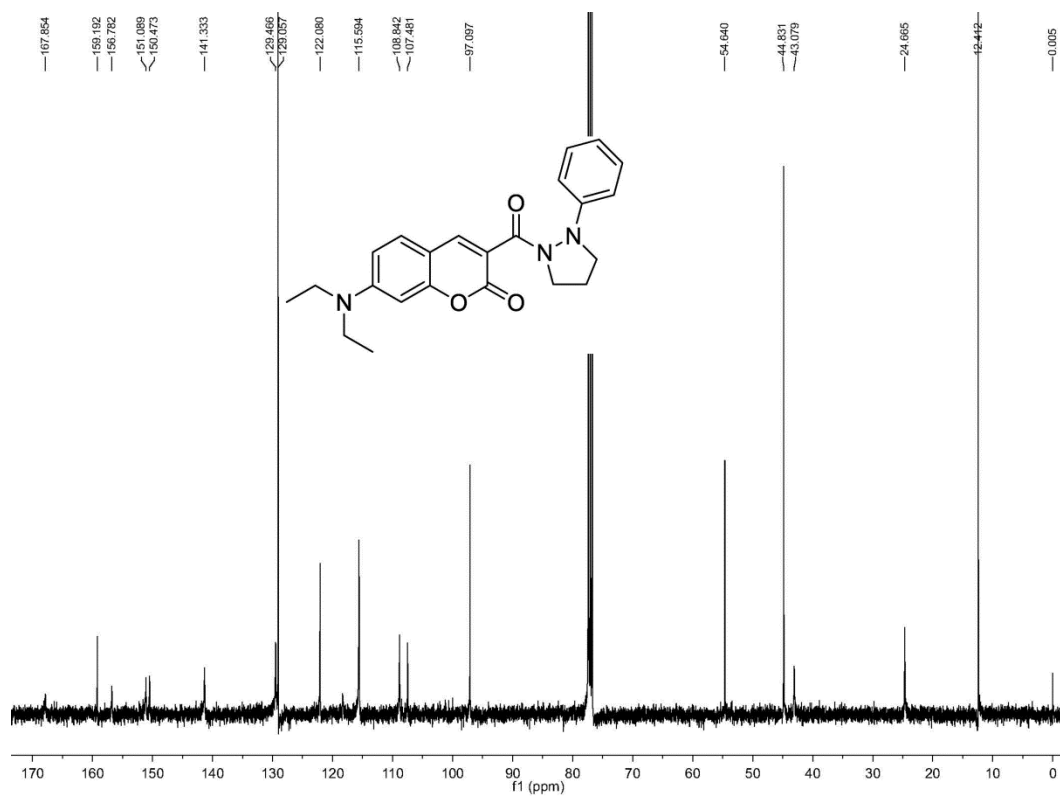

**Figure S23.** <sup>13</sup>C NMR spectra of **2**.

## References:

- 1 J. M. Aubry, *J. Org. Chem.*, 1989, **54**, 726-728.
- 2 N. Umezawa, K. Tanaka, Y. Urano, K. Kikuchi, T. Higuchi, T. Nagano, *Angew. Chem. Int. Ed.*, 1999, **38**, 2899-2901.
- 3 H. H. Fenton, *Chem. News*, 1876, **33**, 190-190.
- 4 K. Setsukinai, Y. Urano, K. Kakinuma, H. J. Majima, T. Nagano, *J. Biol. Chem.*, 2003, **278**, 3170-3175.
- 5 Z. Sun, F. Liu, Y. Chen, P. K. H. Tam, D. Yang, *Org. Lett.*, 2008, **10**, 2171-2174.
- 6 Y. Yang, H. J. Cho, J. Lee, I. Shin, J. Tae, *Org. Lett.*, 2009, **11**, 859-861.
- 7 M. K. Eberle, G. G. Kahle, S. M. Talati, *Tetrahedron*, 1973, **29**, 4045-4048.
- 8 J. N. Demas, G. A. Crosby, *J. Phys. Chem.*, 1971, **75**, 991-1024.
- 9 C. A. Parker, W. T. Rees, *Analyst*, 1960, **85**, 587-600.
- 10 S. F. Forgues, D. Lavabre, *J. Chem. Educ.*, 1999, **76**, 1260-1264.
- 11 A. Ajayaghosh, P. Carol, S. Sreejith, *J. Am. Chem. Soc.*, 2005, **127**, 14962-14963.
- 12 M. Shortreed, R. Kopelman, M. Kuhn, B. Hoyland, *Anal. Chem.*, 1996, **68**, 1414-1418.
- 13 A. Caballero, R. Martínez, V. Lloveras, I. Ratera, J. Vidal-Gancedo, K. Wurst, A. Tarraga, P. Molina, J. Veciana, *J. Am. Chem. Soc.*, 2005, **127**, 15666-15667.
- 14 W. Chen, W. Gong, Z. Ye, Y. Lin, G. Ning, *Dalton Trans.*, 2013, **42**, 10093-10096.
- 15 B. Chandra, S. P. Mahanta, N. N. Pati, S. Baskaran, R. K. Kanaparthi, C. Sivasankar, P. K. Panda, *Org. Lett.*, 2013, **15**, 306-309.
- 16 H. Zhu, J. Fan, J. Wang, H. Mu, X. Peng, *J. Am. Chem. Soc.*, 2014, **136**, 12820-12823.
